# Supplementary material
Source: PubMed Central journal article supplement (PMC6635447)
Supplement: supp_RA119.009305_152756_3_supp_339552_psf5fw.pdf [file supp_RA119.009305_152756_3_supp_339552_psf5fw.pdf]

## **SUPPORTING INFORMATION**

### **Human cytochrome P450 enzymes bind drugs and other substrates using conformational selection modes**

F. Peter Guengerich, Clayton J. Wilkey, and Thanh T. N. Phan

#### **CONTENTS**

**Figure S1. Binding of testosterone to P450 3A4.**

**Figure S2. Binding of bromocriptine to P450 3A4.**

**Figure S3. Binding of ketoconazole to P450 3A4.**

**Figure S4. Spin state analysis of P450s 3A4 and 17A1.**

**References**

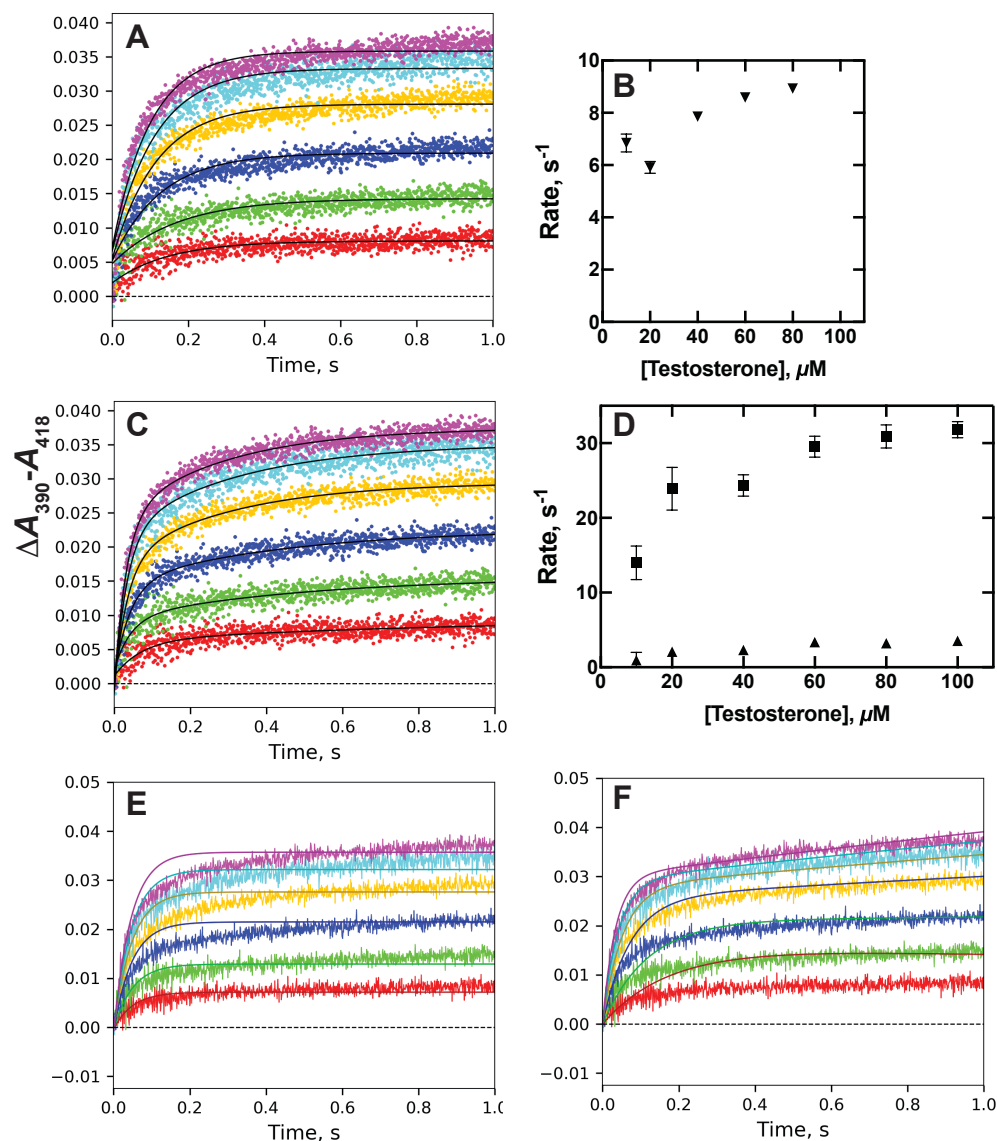

**Figure S1. Binding of testosterone to P450 3A4.** Data were from ref. (1). P450 3A4 was mixed with varying concentrations of testosterone (20-red, 40-green, 80-dark blue, 120-gold, 160-light blue, and 200-magenta  $\mu\text{M}$ ). *A*, single exponential fit of data. *B*, plot of single exponential (Part A) rates of binding vs. testosterone concentration. *C*, biexponential fit of data. *D*, plots of biexponential rates of binding (from Part C) as a function of testosterone concentration (fast (■) and slow (▲)). *E*, fits of data to an induced fit model with  $k_1 = 1.7 \times 10^6 \text{ M}^{-1} \text{ s}^{-1}$ ,  $k_{-1} = 310 \text{ s}^{-1}$ ,  $k_2 = 3.6 \text{ s}^{-1}$ , and  $k_{-2} = 20 \text{ s}^{-1}$  ( $\epsilon_{390-418} = 52 \text{ mM}^{-1} \text{ cm}^{-1}$ ). *F*, fits of data to a conformational selection model with  $k_1 = 0.028 \text{ s}^{-1}$ ,  $k_{-1} = 1.4 \text{ s}^{-1}$ ,  $k_2 = 0.13 \times 10^6 \text{ M}^{-1} \text{ s}^{-1}$ , and  $k_{-2} = 2.3 \text{ s}^{-1}$  ( $\epsilon_{390-418} = 56 \text{ mM}^{-1} \text{ cm}^{-1}$ ).

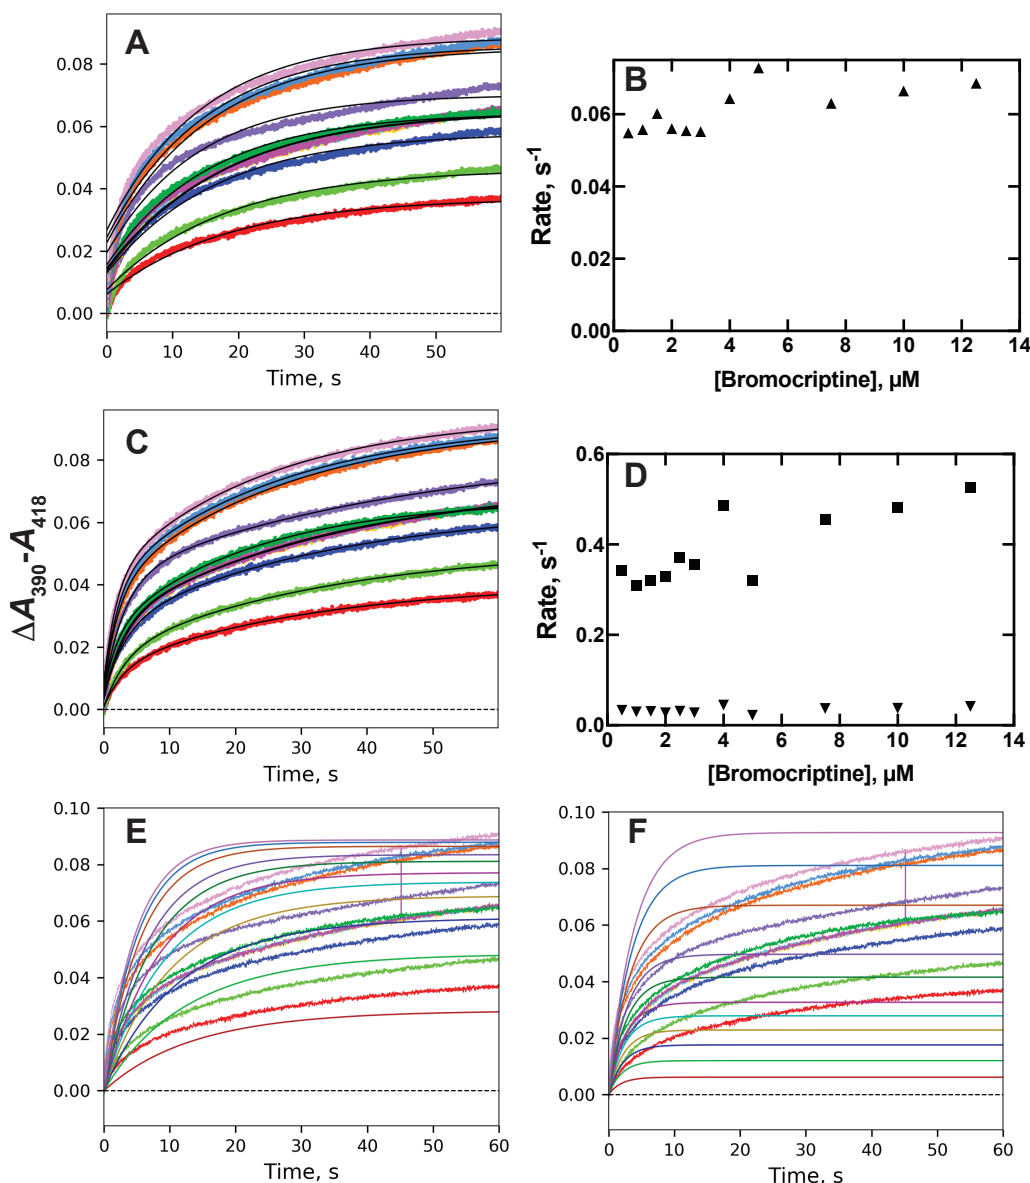

**Figure S2. Binding of bromocriptine to P450 3A4.** Data were from ref. (1). P450 3A4 (2  $\mu\text{M}$ ) was mixed with 1-red, 2-green, 3-dark blue, 4-mauve, 5-green, 6-light blue, 8-purple, 10-red, 15-orange, 20-blue, or 25-pink  $\mu\text{M}$  bromocriptine. *A*, single exponential fit of data. *B*, plot of single exponential (Part A) rates of binding vs. bromocriptine concentration. *C*, biexponential fit of data. *D*, plots of biexponential rates of binding (from Part C) as a function of bromocriptine concentration (fast ( $\blacksquare$ ) and slow ( $\blacktriangledown$ )). *E*, fits of data to an induced fit model with  $k_1 = 4.1 \times 10^6 \text{ M}^{-1} \text{ s}^{-1}$ ,  $k_{-1} = 36 \text{ s}^{-1}$ ,  $k_2 = 0.25 \text{ s}^{-1}$ , and  $k_{-2} = 0.25 \text{ s}^{-1}$  ( $\epsilon_{390-418} 25 \text{ mM}^{-1} \text{ cm}^{-1}$ ). *F*, fits of data to a conformational selection model with  $k_1 = 0.15 \text{ s}^{-1}$ ,  $k_{-1} 8.8 \text{ s}^{-1}$ ,  $k_2 = 1.0 \times 10^6 \text{ M}^{-1} \text{ s}^{-1}$ , and  $k_{-2} = 0.5 \text{ s}^{-1}$  ( $\epsilon_{390-418} 26 \text{ mM}^{-1} \text{ cm}^{-1}$ ).

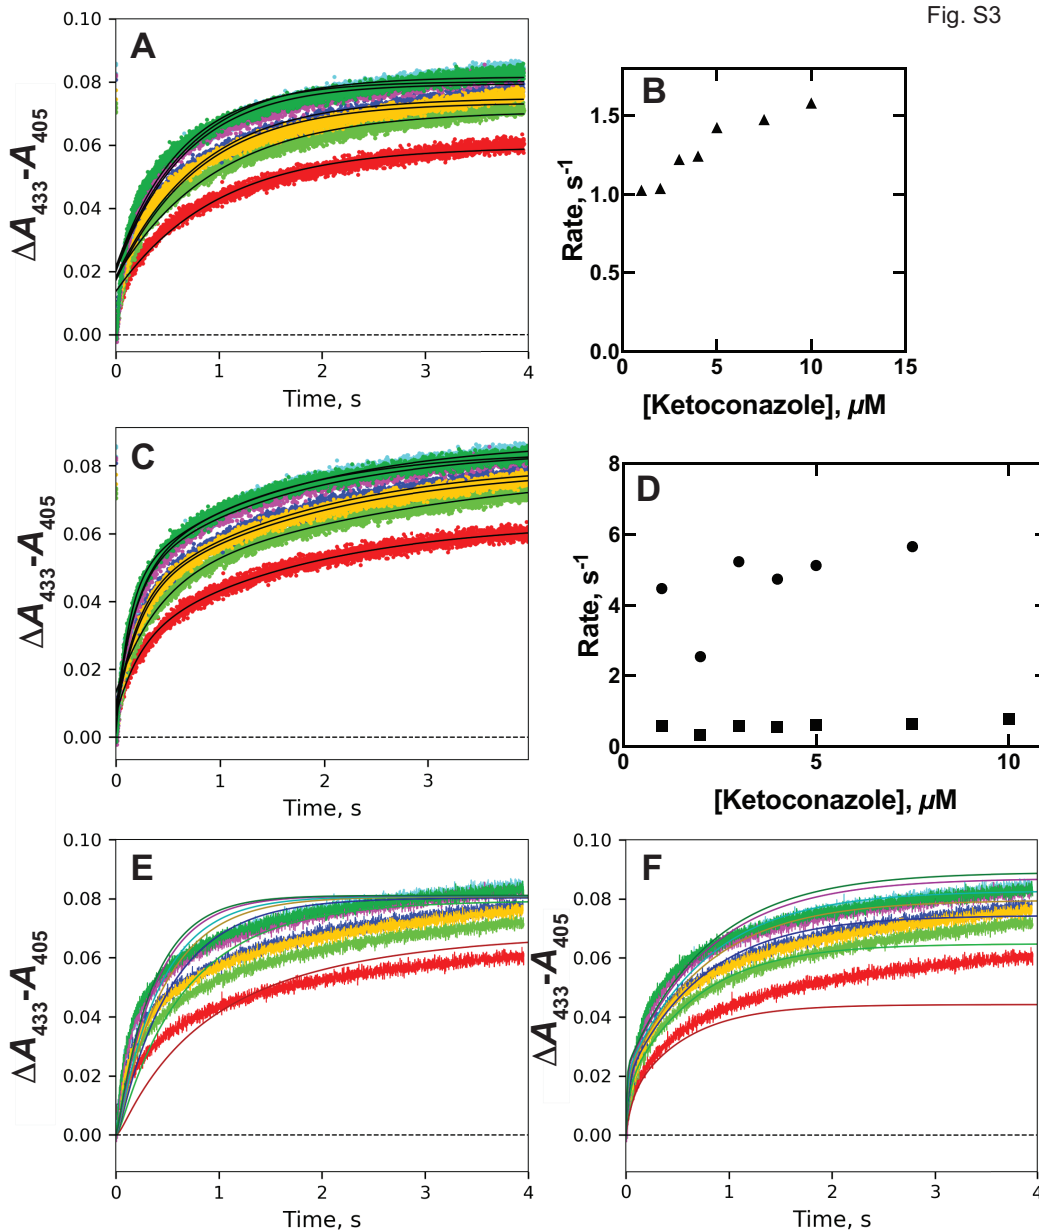

**Figure S3. Binding of ketoconazole to P450 3A4.** Data were from ref. (2). P450 3A4 ( $4 \mu\text{M}$ ) were mixed with varying concentrations of ketoconazole (2-red, 4-green, 6-gold, 8-blue, 10-mauve, 15-green, or 20-blue  $\mu\text{M}$ ). *A*, single exponential fit of data. *B*, plot of single exponential (Part A) rates of binding vs. ketoconazole concentration. *C*, double-exponential fits of data. *D*, plots of biexponential rates of binding (from Part C) as a function of ketoconazole concentration (fast (●) and slow (■)). *E*, fits of data to an induced fit model with  $k_1 = 2.4 \times 10^6 \text{ M}^{-1} \text{ s}^{-1}$ ,  $k_{-1} = 15 \text{ s}^{-1}$ ,  $k_2 = 3.2 \text{ s}^{-1}$ , and  $k_{-2} = 0.05 \text{ s}^{-1}$  ( $\epsilon_{433-405} 10.5 \text{ mM}^{-1} \text{ cm}^{-1}$ ). *F*, fits of data to a conformational selection model with  $k_1 = 1.2 \text{ s}^{-1}$ ,  $k_{-1} = 3.6 \text{ s}^{-1}$ ,  $k_2 = 2.7 \times 10^6 \text{ M}^{-1} \text{ s}^{-1}$ , and  $k_{-2} = 1.7 \text{ s}^{-1}$  ( $\epsilon_{405-433} 16 \text{ mM}^{-1} \text{ cm}^{-1}$ ).

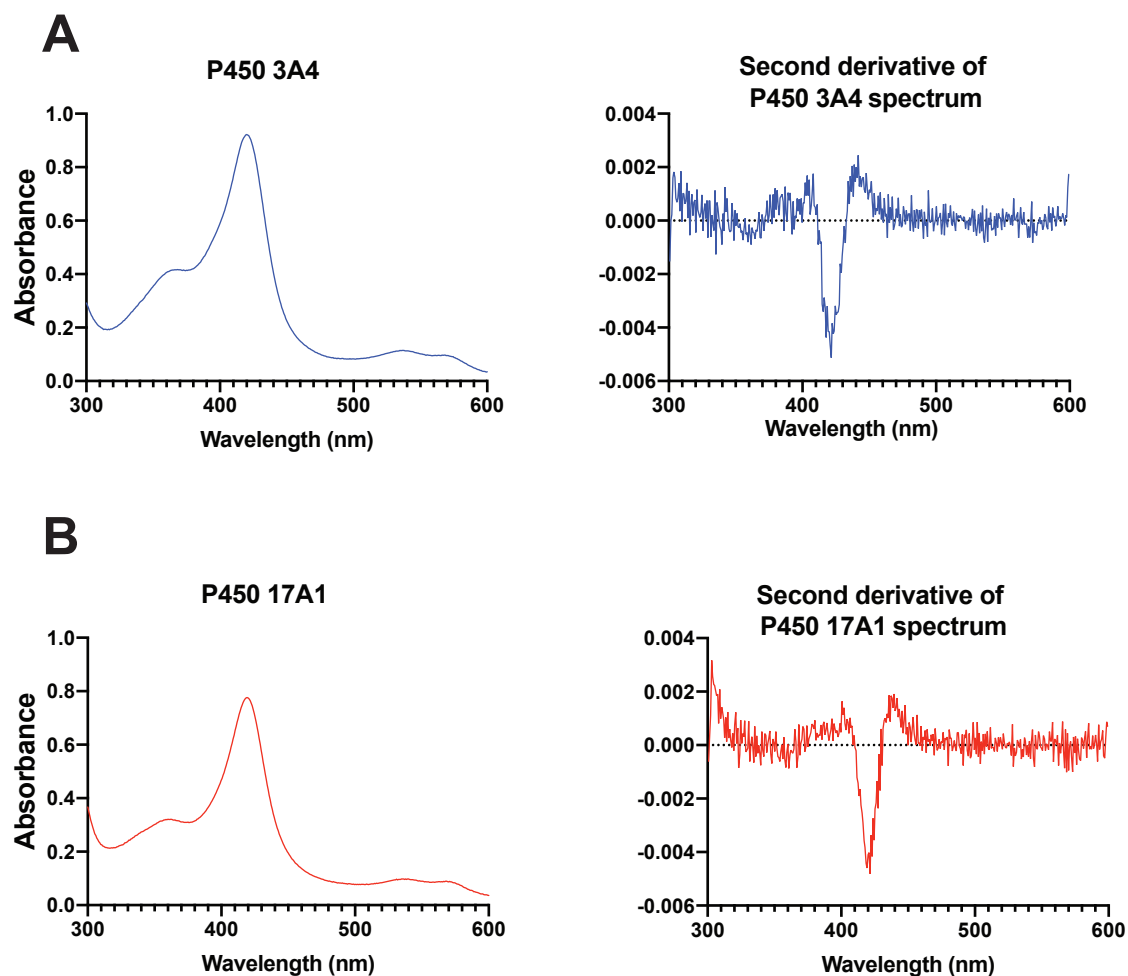

**Figure S4. Spin state analysis of P450s 3A4 (Part A) and 17A1 (Part B).** The estimates (>95% low-spin) were made by analyzing the negative peaks (418 and 390 nm for low- and high-spin iron, respectively) generated in second derivative analysis of spectra recorded in the absence of ligand (3). A, P450 3A4; B, P450 17A1.

#### References

1. Isin, E. M., and Guengerich, F. P. (2006) Kinetics and thermodynamics of ligand binding by cytochrome P450 3A4. *J. Biol.Chem.* **281**, 9127-9136
2. Isin, E. M., and Guengerich, F. P. (2007) Multiple sequential steps involved in the binding of inhibitors to cytochrome P450 3A4. *J. Biol.Chem.* **282**, 6863-6874
3. O'Haver, T. C., and Green, G. L. (1976) Numerical error analysis of derivative spectrometry for the quantitative analysis of mixtures. *Anal. Chem.* **48**, 312-318
